# Supplementary material
Source: publisher figshare collection journal article supplement (https://sage.figshare.com/ndownloader/files/38099596)
Supplement: Supplementary file 1 [file 38099596]

**Online supplement tables**

Table S1. Weighted means and standard errors of policy-relevant variables, for Latinx students only, by race (presented as percentages) (n=1560)

|  | **Amer. Indian/Alaska Native** | **Asian** | **Black/African-American** | **More than one race** | **Native Hawaiian/Pacific Islander** | **White** |
| --- | --- | --- | --- | --- | --- | --- |
| **Full-time student** | 35% (0.05) | 33% (0.13)! | 44% (0.07) | 33% (0.07) | 36% (0.08) | 40% (0.02) |
| **Under age 24**** | 98% (0.01) | 88% (0.08) | 94% (0.03) | 96% (0.03) | 91% (0.05) | 86% (0.02) |
| **Delayed enrollment** | 28% (0.05) | 41% (0.12) | 37% (0.08) | 45% (0.09) | 33% (0.09) | 43% (0.03) |
| **Developmental education** | 56% (0.05) | 67% (0.12) | 63% (0.07) | 50% (0.09) | 52% (0.08) | 54% (0.02) |
| **GPA>3.0** | 42% (0.06) | 56% (0.11) | 62% (0.07) | 54% (0.09) | 47% (0.08) | 55% (0.03) |
| **Continuous enrollment** | 75% (0.05) | 75% (0.12) | 68% (0.07) | 80% (0.07) | 72% (0.06) | 75% (0.02) |
| **Associate attainment** | 11% (0.04)! | N/A | 7% (0.03)! | 7% (0.04)!! | 10% (0.04)!! | 8% (0.01) |
| **STEM major** | 11% (0.03) | 23% (0.14)!! | 11% (0.04)! | N/A | 13% (0.05)! | 10% (0.01) |

* p<.05; ** p<.01; *** p<.001; N/A = suppressed due to possible identification concerns, in accordance with the NCES restricted data license agreement.

! = standard error is between 30 and 50 percent of the estimated mean value, indicating an unstable estimate

!! = standard error is greater than 50 percent of the estimated mean value, indicating a very unstable estimate

NOTE: Numbers are rounded to the nearest 10 in accordance with the NCES restricted data license agreement. Some totals may not agree due to this rounding.

SOURCE: U.S. Department of Education, National Center for Education Statistics, 2012-14 Beginning Postsecondary Students (BPS:12/14).

Table S2. Weighted means and standard errors of policy-relevant variables, by gender, disability, and first generation status

(presented as percentages)

| **Latinx Students (n=1560)** | | | | | | |
| --- | --- | --- | --- | --- | --- | --- |
|  | Woman | Man | Disability | No Disability | First Gen | Non-FirstGen |
| **Full-time student** | 39% (0.03) | 40% (0.03) | 37% (0.05) | 40% (0.02) | 38%* (0.02) | 50%* (0.05) |
| **Under age 24** | 89% (0.02) | 88% (0.03) | 84% (0.05) | 89% (0.02) | 88% (0.02) | 90% (0.03) |
| **Delayed enrollment*** | 37%* (0.03) | 45%* (0.03) | 31% (0.06) | 41% (0.03) | 40% (0.03) | 42% (0.05) |
| **Developmental education** | 56% (0.02) | 54% (0.03) | 56% (0.06) | 55% (0.02) | 55% (0.02) | 59% (0.05) |
| **GPA>3.0** | 53% (0.03) | 55% (0.03) | 46% (0.07) | 54% (0.02) | 53% (0.02) | 60% (0.05) |
| **Continuous enrollment** | 74% (0.02) | 75% (0.03) | 77% (0.04) | 74% (0.02) | 74% (0.02) | 78% (0.04) |
| **Associate attainment** | 8% (0.01) | 7% (0.01) | 10% (0.04)! | 8% (0.01) | 8% (0.01) | 9% (0.03)! |
| **STEM major** | 5%*** (0.01) | 17%*** (0.02) | 12% (0.03) | 10% (0.01) | 10% (0.01) | 13% (0.03) |
| **American Indian / Alaska Native Students (n=220)** | | | | | | |
|  | Woman | Man | Disability | No Disability | First Gen | Non-FirstGen |
| **Full-time student** | 52%*** (0.07) | 22%*** (0.04) | 34% (0.12)!! | 38% (0.05) | 39% (0.05) | 27% (0.11)! |
| **Under age 24** | 94% (0.02) | 97% (0.02) | 97% (0.02) | 95% (0.02) | 95% (0.02) | 99% (0.01) |
| **Delayed enrollment** | 28% (0.07) | 33% (0.08) | 21% (0.12)!! | 32% (0.05) | 31% (0.05) | 26% (0.13)! |
| **Developmental education** | 53% (0.07) | 57% (0.07) | 83%*** (0.06) | 50%*** (0.05) | 51%* (0.05) | 78%* (0.09) |
| **GPA>3.0** | 53% (0.07) | 35% (0.08) | 32% (0.12)! | 46% (0.06) | 47% (0.06) | 28% (0.13)! |
| **Continuous enrollment** | 75% (0.06) | 73% (0.08) | 56% (0.13) | 77% (0.05) | 75% (0.05) | 69% (0.15) |
| **Associate attainment** | 14% (0.05)! | 5% (0.04)!! | N/A | 11% (0.03) | 11% (0.03) | N/A |
| **STEM major** | 4%*** (0.02)! | 28%*** (0.07) | 27% (0.17)!! | 13% (0.03) | 9%*** (0.03)! | 54%*** (0.14) |
| **Asian Students (n=350)** | | | | | | |
|  | Woman | Man | Disability | No Disability | First Gen | Non-FirstGen |
| **Full-time student** | 55% (0.07) | 48% (0.08) | 47% (0.18)! | 52% (0.05) | 51% (0.06) | 53% (0.08) |
| **Under age 24** | 90% (0.04) | 92% (0.03) | 97% (0.03) | 91% (0.03) | 89% (0.03) | 89% (0.03) |
| **Delayed enrollment** | 40% (0.06) | 49% (0.07) | 51% (0.12) | 44% (0.05) | 44% (0.05) | 46% (0.08) |
| **Developmental education** | 53% (0.07) | 56% (0.06) | 54% (0.12) | 54% (0.05) | 56% (0.06) | 51% (0.08) |
| **GPA>3.0** | 74% (0.05) | 60% (0.06) | 71% (0.09) | 66% (0.05) | 67% (0.05) | 66% (0.07) |
| **Continuous enrollment** | 85% (0.04) | 87% (0.03) | 80% (0.09) | 86% (0.03) | 85% (0.03) | 88% (0.05) |
| **Associate attainment** | 7%* (0.02) | N/A | N/A | 5%*** (0.01) | 5% (0.01) | N/A |
| **STEM major** | 7%*** (0.03)! | 28%*** (0.06) | N/A | 19% (0.04) | 18% (0.04) | 20% (0.05) |
| **Black Students (n=1290)** | | | | | | |
|  | Woman | Man | Disability | No Disability | First Gen | Non-FirstGen |
| **Full-time student** | 55% (0.03) | 50% (0.04) | 51% (0.06) | 53% (0.03) | 52% (0.03) | 58% (0.05) |
| **Under age 24** | 81%* (0.02) | 72%* (0.03) | 68%* (0.06) | 78%* (0.02) | 74%** (0.02) | 87%** (0.03) |
| **Delayed enrollment** | 46% (0.03) | 51% (0.03) | 56% (0.06) | 47 (0.03) | 49% (0.03) | 44% (0.05) |
| **Developmental education** | 62% (0.03) | 58% (0.03) | 75%** (0.05) | 57%** (0.02) | 60% (0.02) | 58% (0.05) |
| **GPA>3.0** | 53% (0.03) | 48% (0.03) | 51% (0.06) | 50% (0.02) | 49% (0.02) | 57% (0.05) |
| **Continuous enrollment** | 71% (0.03) | 73% (0.03) | 71% (0.06) | 72% (0.02) | 72% (0.02) | 74% (0.05) |
| **Associate attainment** | 8% (0.01) | 8% (0.01) | 9% (0.03)! | 8% (0.01) | 8% (0.01) | 8% (0.02) |
| **STEM major** | 4%*** (0.01) | 16%*** (0.03) | 11% (0.03) | 9% (0.01) | 9% (0.01) | 12% (0.03) |
| **Multiracial students (n=340)** | | | | | | |
|  | Woman | Man | Disability | No Disability | First Gen | Non-FirstGen |
| **Full-time student** | 49% (0.05) | 46% (0.06) | 40% (0.09) | 48% (0.04) | 46% (0.04) | 50% (0.08) |
| **Under age 24** | 89% (0.03) | 90% (0.04) | 82% (0.08) | 91% (0.03) | 88% (0.03) | 93% (0.04) |
| **Delayed enrollment** | 33% (0.05) | 43% (0.07) | 48% (0.11) | 36% (0.05) | 42% (0.05) | 23% (0.08)! |
| **Developmental education** | 52% (0.05) | 57% (0.06) | 51% (0.10) | 55% (0.05) | 54% (0.05) | 57% (0.07) |
| **GPA>3.0** | 66% (0.05) | 55% (0.06) | 64% (0.09) | 60% (0.04) | 64% (0.04) | 50% (0.08) |
| **Continuous enrollment** | 80% (0.05) | 83% (0.05) | 95%* (0.03) | 80%* (0.04) | 80% (0.04) | 86% (0.07) |
| **Associate attainment** | 12% (0.03) | 12% (0.04)! | 14% (0.07)! | 12% (0.03) | 8%* (0.03)! | 22%* (0.06) |
| **STEM major** | 6%** (0.02)! | 22%** (0.05) | 27% (0.10)! | 12% (0.03) | 15% (0.03) | 11% (0.05)! |
| **Native Hawaiian / Pacific Islander students (n=130)** | | | | | | |
|  | Woman | Man | Disability | No Disability | First Gen | Non-FirstGen |
| **Full-time student** | 44% (0.10) | 35% (0.09) | 56% (0.21)! | 39% (0.07) | 40% (0.07) | 37% (0.16)! |
| **Under age 24** | 92% (0.04) | 92% (0.06) | 97% (0.03) | 92% (0.04) | 90% (0.05) | N/A |
| **Delayed enrollment** | 29% (0.10)! | 33% (0.10)! | N/A | 31% (0.08) | 30% (0.07) | 38% (0.18)! |
| **Developmental education** | 71%** (0.09) | 33%** (0.09) | 55% (0.19)! | 50% (0.07) | 53% (0.07) | 41% (0.19)! |
| **GPA>3.0** | 47% (0.11) | 60% (0.07) | 44% (0.20)! | 54% (0.07) | 49% (0.07) | 74% (0.12) |
| **Continuous enrollment** | 81% (0.08) | 72% (0.08) | 84% (0.10) | 75% (0.06) | 73% (0.07) | 88% (0.07) |
| **Associate attainment** | 9% (0.05)!! | 7% (0.04)!! | N/A | 8% (0.03)! | 8% (0.04)! | N/A |
| **STEM major** | N/A | 23%** (0.08)! | N/A | 13% (0.05)! | 12% (0.05)! | N/A |
| **White students (n=4970)** | | | | | | |
|  | Woman | Man | Disability | No Disability | First Gen | Non-FirstGen |
| **Full-time student** | 47% (0.02) | 46% (0.02) | 44% (0.04) | 47% (0.01) | 47% (0.01) | 47% (0.02) |
| **Under age 24** | 81% (0.01) | 79% (0.02) | 77% (0.03) | 81% (0.01) | 77%*** (0.01) | 88%*** (0.01) |
| **Delayed enrollment** | 45%* (0.02) | 51%* (0.02) | 52% (0.03) | 47% (0.01) | 50%*** (0.02) | 42%*** (0.02) |
| **Developmental education** | 52%** (0.02) | 45%** (0.02) | 52% (0.04) | 48% (0.01) | 50%* (0.01) | 45%* (0.02) |
| **GPA>3.0** | 62% (0.02) | 58% (0.02) | 54% (0.03) | 61% (0.01) | 59% (0.01) | 62% (0.02) |
| **Continuous enrollment** | 77% (0.01) | 78% (0.02) | 80% (0.02) | 77% (0.01) | 77% (0.01) | 78% (0.02) |
| **Associate attainment** | 12% (0.01) | 12% (0.01) | 6%*** (0.01) | 13%*** (0.01) | 11%* (0.01) | 14%* (0.01) |
| **STEM major** | 7%*** (0.01) | 21%*** (0.01) | 13% (0.03) | 13% (0.01) | 13% (0.01) | 15% (0.02) |

* p<.05; ** p<.01; *** p<.001; N/A = suppressed due to possible identification concerns, in accordance with the NCES restricted data license agreement.

! = standard error is between 30 and 50 percent of the estimated mean value, indicating an unstable estimate

!! = standard error is greater than 50 percent of the estimated mean value, indicating a very unstable estimate

NOTE: Numbers are rounded to the nearest 10 in accordance with the NCES restricted data license agreement. Some totals may not agree due to this rounding.

SOURCE: U.S. Department of Education, National Center for Education Statistics, 2012-14 Beginning Postsecondary Students (BPS:12/14).
